# Supplementary material for: Kinesin-1 activity recorded in living cells with a precipitating dye
Source: PubMed Central journal article supplement (PMC7935933; doi:10.1038/s41467-021-21626-1), 2021-03-05
Supplement: 41467_2021_21626_MOESM4_ESM.pdf [file 41467_2021_21626_MOESM4_ESM.pdf]

### Description of Additional Supplementary Files

**File:** Supplementary Movie 1

**Description:** crystals growth over time in live PTK2 cells treated with 20  $\mu$ M QPD-OTf.

**File:** Supplementary Movie 2

**Description:** HeLa cells treated with QPD-OTf (20  $\mu$ M, 1.5 hours), washed and imaged over time to observe crystal disappearance.

**File:** Supplementary Movie 3

**Description:** crystals growth from Golgi apparatus in U2OS cells transfected with mCherry-Giantin and treated with 20  $\mu$ M QPD-OTf (magenta: Golgi; cyan: crystal).
